# Supplementary material for: Regeneration of glomerular metabolism and function by podocyte pyruvate kinase M2 in diabetic nephropathy
Source: PubMed Central journal article supplement (PMC8983139; doi:10.1172/jci.insight.155260), 2022-03-08
Supplement: jciinsight-7-155260-s182.pdf [file jciinsight-7-155260-s182.pdf]

## Supplemental Figure 1

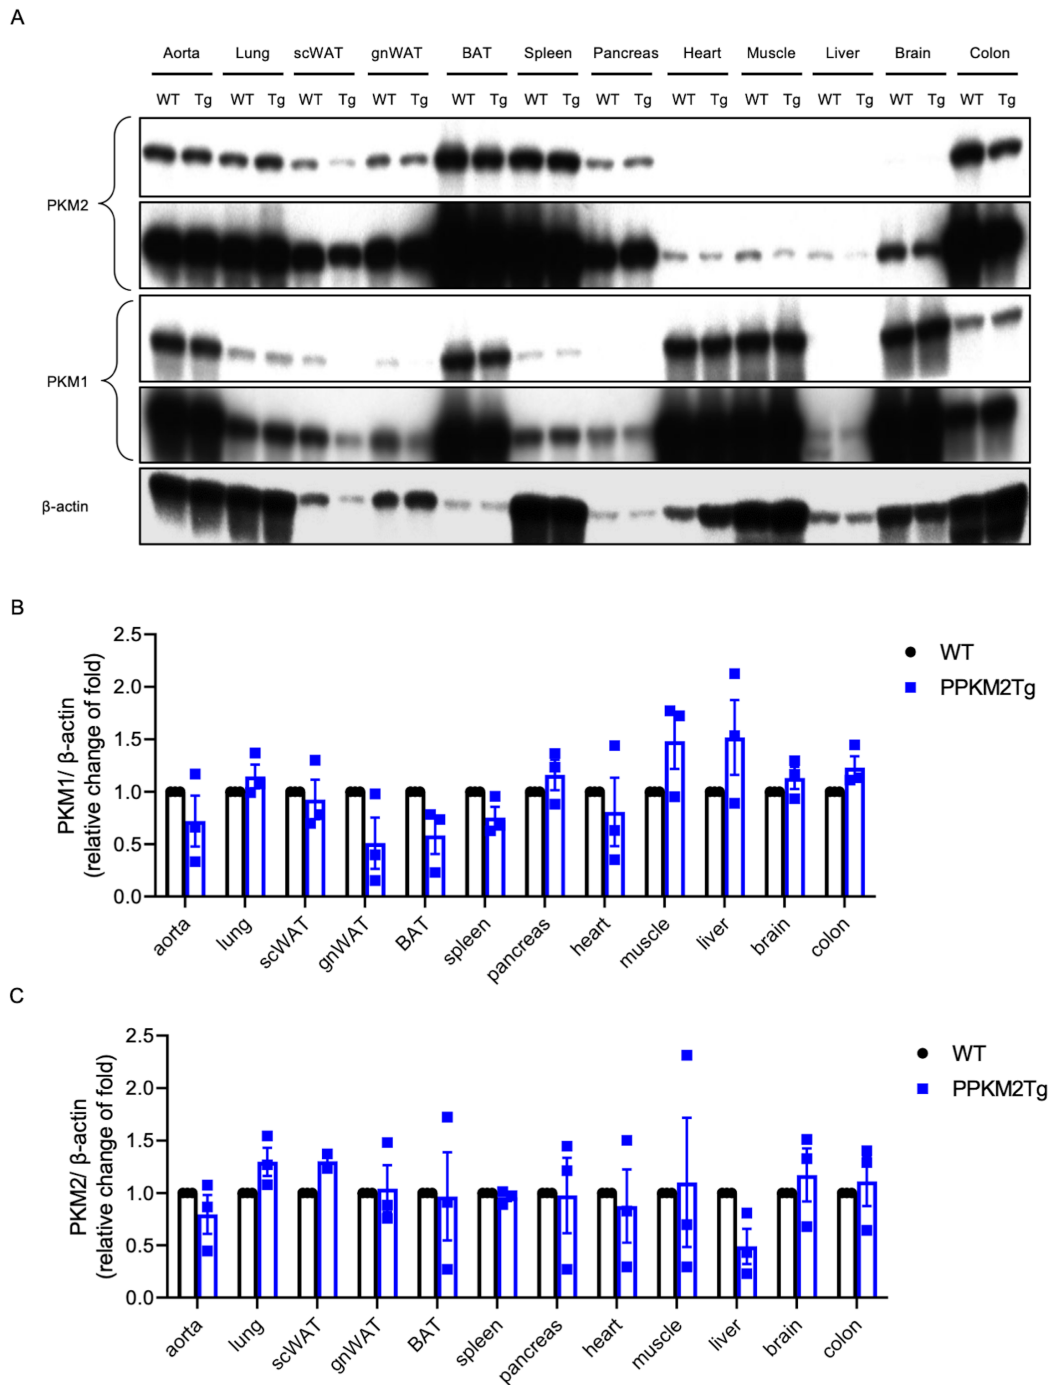

### Supplemental Figure 1. PKM2 expression from different tissues of PPKM2Tg mice.

(A, B) PKM2 and PKM1 expression levels in different tissues of WT and PPKM2Tg mice were determined by Western blotting (n = 3 per group). Data are mean ± SEM.

## Supplemental Figure 2

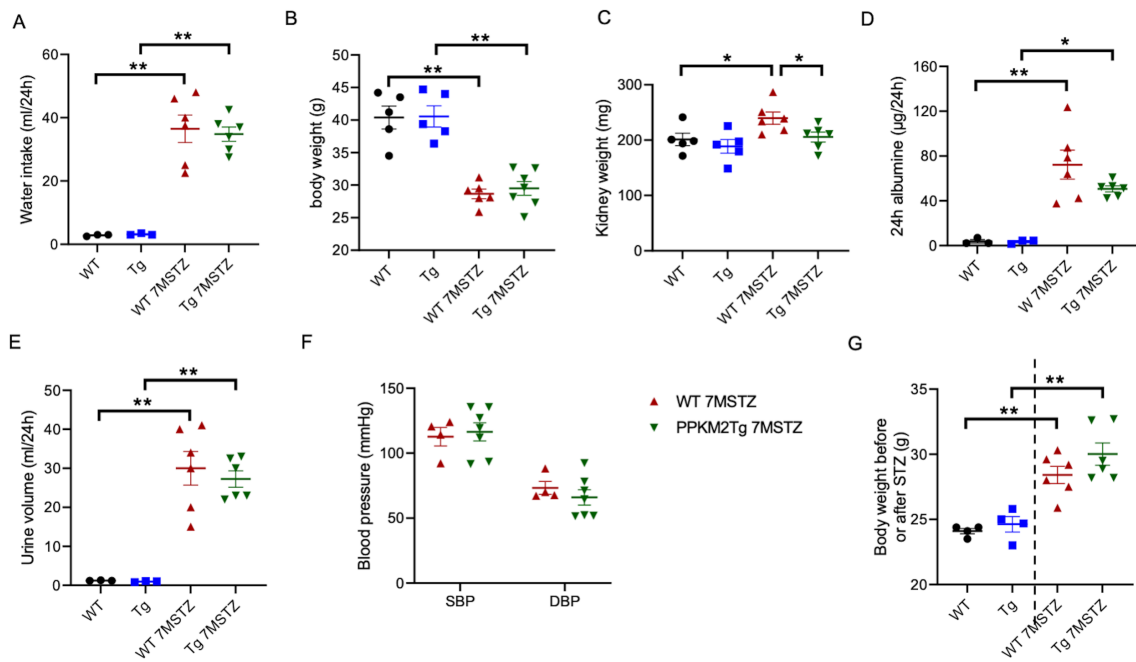

### Supplemental Figure 2. Metabolic parameters of PPKM2Tg 7 months post-STZ.

(A) Water intake of PPKM2Tg and WT mice 7 months post-STZ. (B) Body weight of PPKM2Tg and WT mice 7 months post-STZ. (C) Kidney weight of PPKM2Tg and WT mice 7 months post-STZ. (D) 24-hour albumin of PPKM2Tg and WT mice 7 months post-STZ. (E) 24-hour urine volume of PPKM2Tg and WT mice 7 months post-STZ. (F) Blood pressure of PPKM2Tg and WT mice 7 months post-STZ. (G) Body weight of PPKM2Tg and WT at 8 weeks and 7 months post-STZ. Nondiabetic WT mice (n = 3); PPKM2Tg mice (n = 3); WT 7MSTZ mice (n = 6); PPKM2Tg 7MSTZ mice (n = 6). \* p < 0.05; \*\* p < 0.01; \*\*\* p < 0.001. Data are mean  $\pm$  SEM, two-way ANOVA followed by correction for multiple comparison.

### Supplemental Figure 3

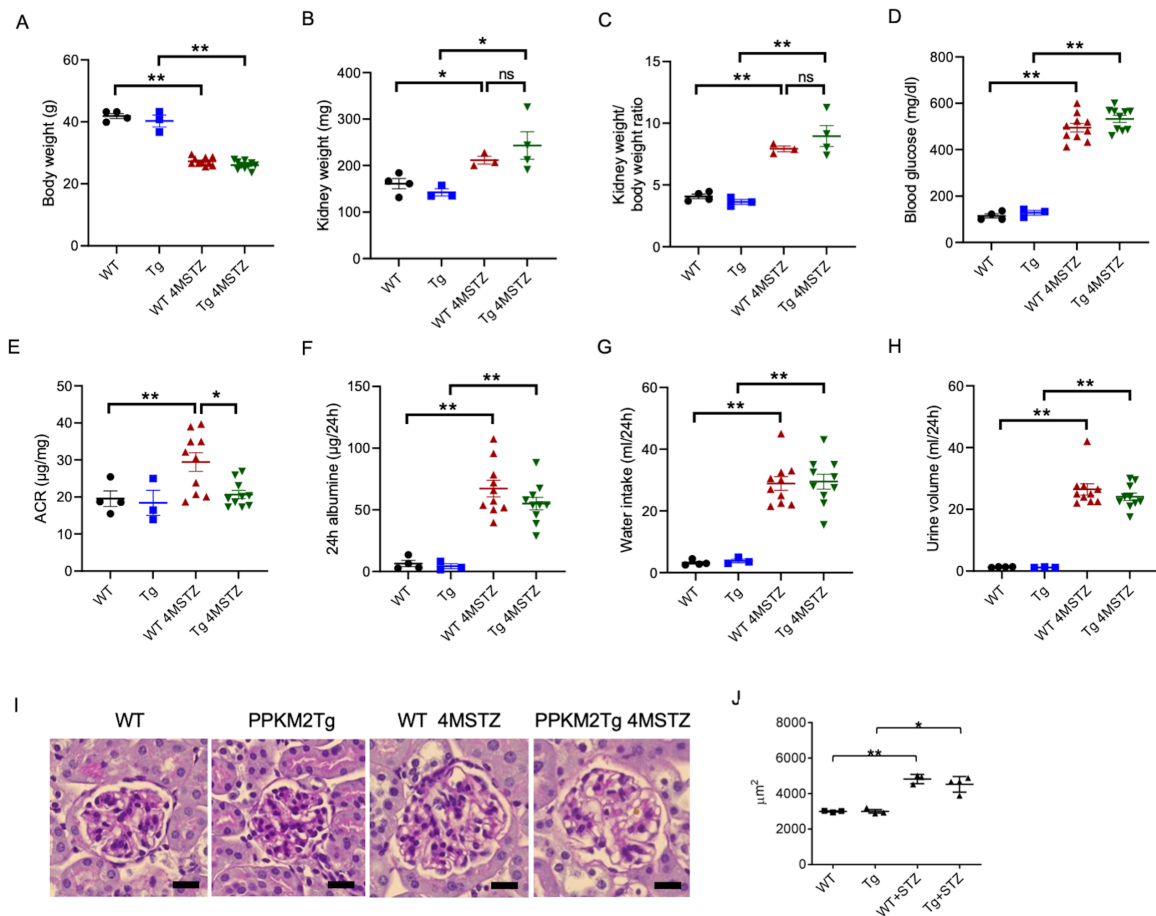

### Supplemental Figure 3. Metabolic parameters of PPKM2Tg 4 months post-STZ.

**(A)** Body weight of PPKM2Tg (Tg 4MSTZ) and WT 4 months post-STZ. **(B)** Kidney weight of PPKM2Tg and WT 4 months post-STZ. **(C)** Kidney weight/ body weight ratio 4 months post-STZ. **(D)** Fasting blood glucose 4 months post-STZ. **(E)** Albumin creatinine ratio 4 months post-STZ. **(F)** 24-hour albumine of PPKM2Tg and WT 4 months post-STZ. **(G)** Water intake of PPKM2Tg and WT 4 months post-STZ. **(H)** 24-hour urine volume of PPKM2Tg and WT 7 months post-STZ. Nondiabetic WT mice ( $n = 4$ ); PPKM2Tg mice ( $n = 3$ ); WT 4MSTZ mice ( $n = 10$ ); PPKM2Tg 4MSTZ mice ( $n = 10$ ). \*  $p < 0.05$ ; \*\*  $p < 0.01$ ; \*\*\*  $p < 0.001$ . **(I)** Representative image of glomeruli 4 months post-STZ by PAS staining.  $n = 10$ -20 images of PAS-stained kidney sections for each mouse. Scale bars, 20µm. **(J)** Glomerular size 4 months post-STZ. Nondiabetic WT mice ( $n = 3$ ); PPKM2Tg mice ( $n = 3$ ); WT 4MSTZ mice ( $n = 4$ ); PPKM2Tg 4MSTZ mice ( $n = 4$ ). \*  $p < 0.05$ ; \*\*  $p < 0.01$ . Data are mean  $\pm$  SEM, two-way ANOVA followed by correction for multiple comparison.

## Supplemental Figure 4

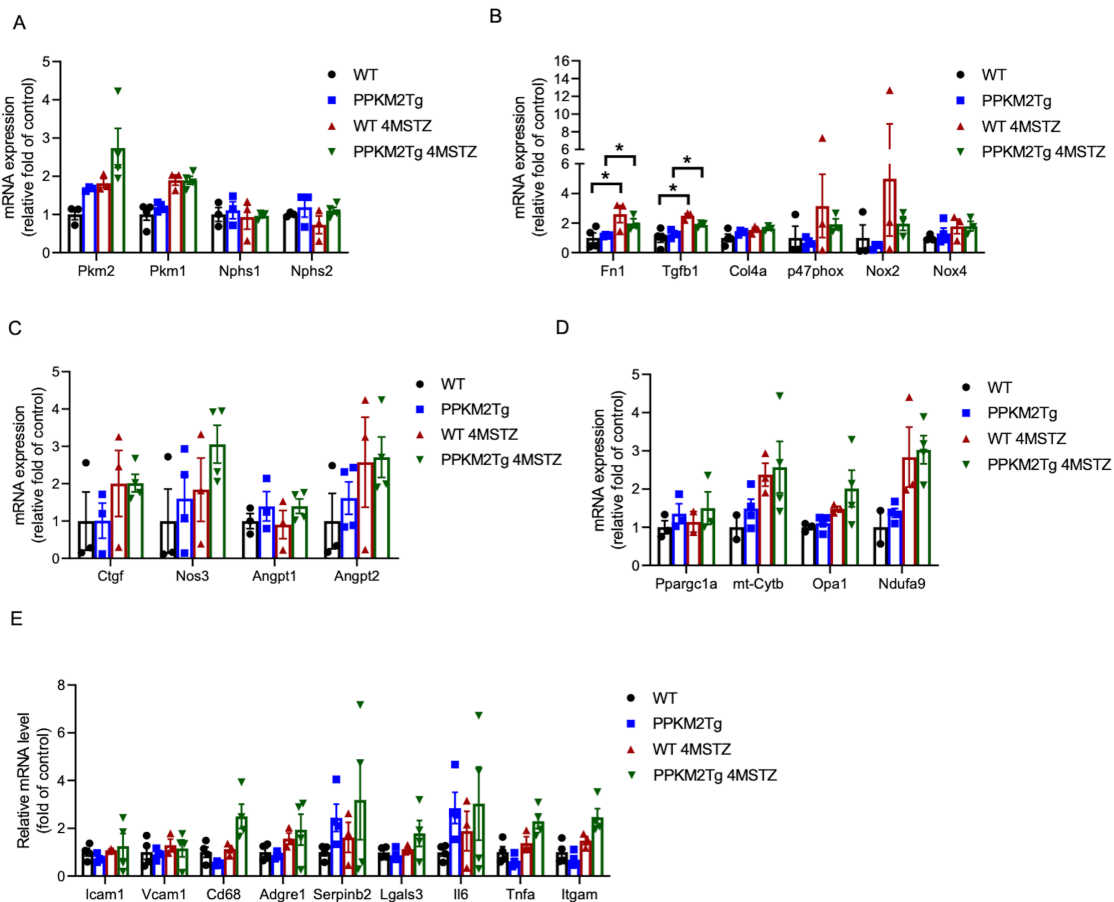

**Supplemental Figure 4. Gene expression in the glomeruli of PPKM2Tg 4 months post-STZ.** (A) mRNA level of PKM1, PKM2 and podocyte markers in the glomeruli of diabetic PPKM2Tg mice 4 months post-STZ. (B) Fibrotic and oxidative stress gene expressions in the glomeruli of PPKM2Tg 4 months post-STZ. (C) mRNA expression of endothelial trophic genes in the glomeruli of diabetic PPKM2Tg mice. (D) mRNA of mitochondrial related genes in the glomeruli of PPKM2Tg 4 months post-STZ. (E) mRNA expression of inflammatory genes in the cortex of diabetic PPKM2Tg mice. WT mice (n = 4); PPKM2Tg mice (n = 4); WT 4MSTZ mice (n = 3); PPKM2Tg 4MSTZ mice (n = 4). \* p < 0.05. Data are mean ± SEM, two-way ANOVA followed by correction for multiple comparison.

**Supplemental Table 1. Medalists' clinical characteristics in DN non-protected (n = 10) and DN protected (n = 11) groups**

|                                      | <b>DN non-protective</b><br>eGFR<45 ml/min/1.73 m <sup>2</sup> (n=10)<br>%; median (Q1, Q3) | <b>DN protective</b><br>eGFR>70 ml/min/1.73 m <sup>2</sup> (n=11)<br>%; median (Q1, Q3) | <b>p</b> |
|--------------------------------------|---------------------------------------------------------------------------------------------|-----------------------------------------------------------------------------------------|----------|
| Sex (female)                         | 8 (80%)                                                                                     | 4 (36.4%)                                                                               | 0.08     |
| Age (years)                          | 71.8 (6.09)                                                                                 | 68.1 (8.54)                                                                             | 0.27     |
| Age at diabetes diagnosis (years)    | 15.6 (6.42)                                                                                 | 10.9 (6.24)                                                                             | 0.11     |
| Duration of diabetes (years)         | 57.5 [53-59]                                                                                | 55 [51-61]                                                                              | 0.75     |
| HbA1c (%)                            | 7.69 (1.19)                                                                                 | 7.32 (1.37)                                                                             | 0.52     |
| Total cholesterol (mg/dL)            | 140.5 (20.2)                                                                                | 161.9 (36.2)                                                                            | 0.12     |
| Body mass index (kg/m <sup>2</sup> ) | 25.4 (3.85)                                                                                 | 27.2 (7.04)                                                                             | 0.53     |
| LDL-C (mg/dL)                        | 66.2 (21.6)                                                                                 | 76.7 (27.8)                                                                             | 0.36     |
| HDL-C (mg/dL)                        | 51.7 (13.1)                                                                                 | 63.7 (18.2)                                                                             | 0.10     |
| Triglycerides (mg/dL)                | 95.5 (40.5)                                                                                 | 75.8 (56.7)                                                                             | 0.38     |
| eGFR (mL/min/1.73m <sup>2</sup> )    | 30.7 (10.6)                                                                                 | 86.5 (8.30)                                                                             | <0.0001  |
| Glomerular VEGF (pg/mg)              | 288.6[21.61-608.2]                                                                          | 672.7[299.4-1128]                                                                       | 0.0026   |
| ACR (mcg/mg)                         | 17.5 [7.25-166]                                                                             | 15.8 [11.8-37]                                                                          | 1        |
| CRP (mg/L)                           | 1.35 [0.84-2.2]                                                                             | 1.1 [0.63-2.1]                                                                          | 0.57     |
| PDR (ETDRS>53)                       | 3 (37.5%)                                                                                   | 5 (55.6%)                                                                               | 0.64     |
| CVD                                  | 7 (70%)                                                                                     | 6 (54.6%)                                                                               | 0.66     |
| Neuropathy (MNSI ≥2)                 | 5 (50%)                                                                                     | 6 (66.7%)                                                                               | 0.65     |
| Random C-peptide (ng/mL)             | 0.17 [0.05-0.36]                                                                            | 0.05 [0.05-0.24]                                                                        | 0.35     |
| Detectable C-peptide>0.05 ng/mL      | 7 (70%)                                                                                     | 4 (36.4%)                                                                               | 0.2      |
| Anti-hypertensive medication use     | 7 (70%)                                                                                     | 6 (54.6%)                                                                               | 0.66     |
| HLA DR3 or DR4-positive              | 10 (100%)                                                                                   | 10 (90.9%)                                                                              | 1        |
| GAD or IA2-positive                  | 4 (40%)                                                                                     | 4 (36.7%)                                                                               | 1        |

Descriptive statistics are presented as mean (+ SD), median (quartile 1 [Q1], quartile 3 [Q3]), or percentage (N), as appropriate.

## Supplemental Figure 5

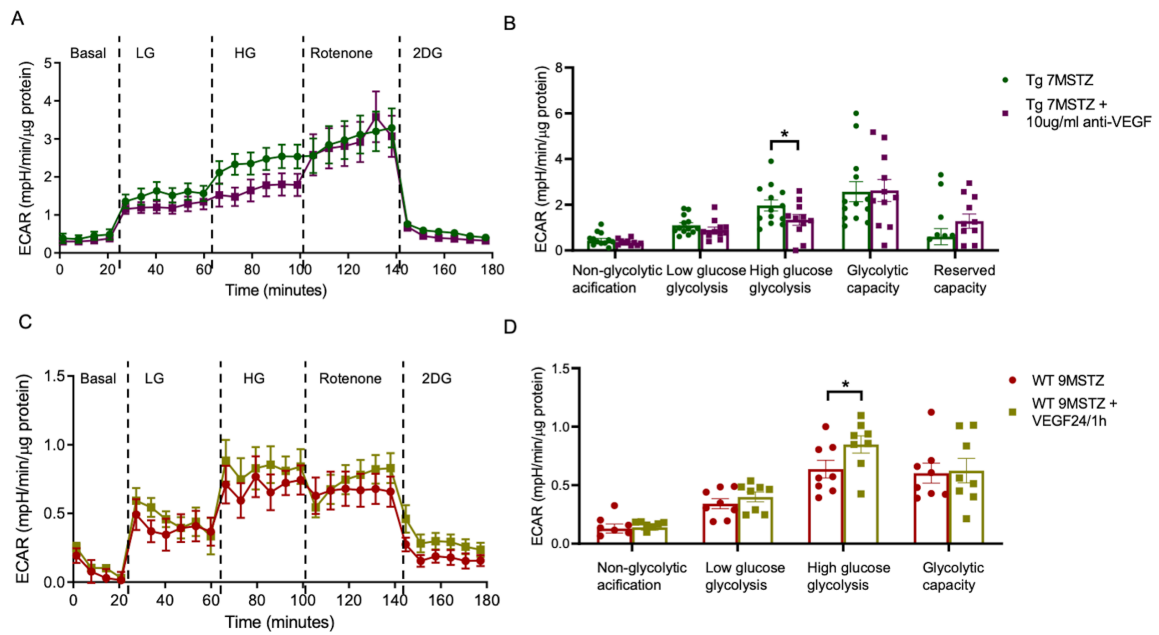

### Supplemental Figure 5. VEGF regulation of glycolytic rate in diabetic mice 7 months post-STZ.

Glomeruli from diabetic PPKM2Tg mice were treated with anti-VEGF (10 $\mu$ g/ml) for 24 hours; representative curve of ECAR and quantitated data were shown in **(A)** and **(B)**. Tg 7MSTZ (n = 7); Tg 7MSTZ + anti-VEGF (n = 10). \*  $p < 0.05$ . Diabetic WT mice 7-9 months post STZ (7-9MSTZ) were incubated with mVEGF (100ng/ml) for 24 hours and addition of mVEGF (100ng/ml) 1 hour before Seahorse assay; representative curve of ECAR and quantitated data were shown in **(C)** and **(D)**. WT 7-9MSTZ (n = 7); WT 7-9MSTZ + VEGF 24/1h (n = 8). \*  $p < 0.05$ . Data are mean  $\pm$  SEM.

## Supplemental Figure 6

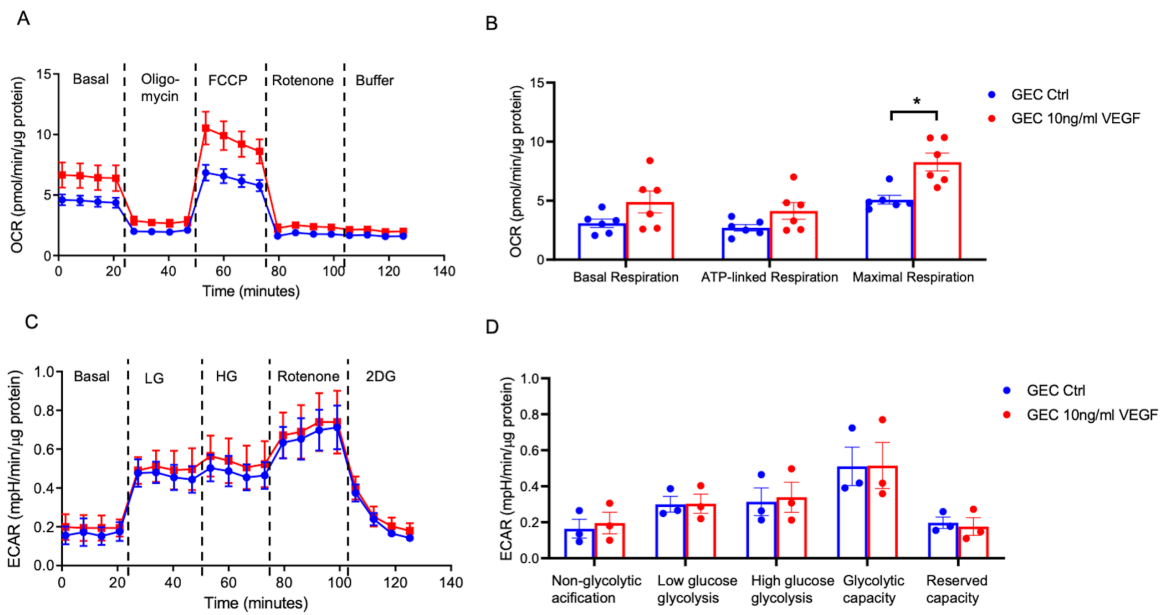

### Supplemental Figure 6. VEGF regulation of glycolytic rate in primary cultured glomerular endothelial cells.

Primary cultured glomerular endothelial cells were incubated with mVEGF (10ng/ml) for 1 hour before Seahorse assay; OCR (**A**) and ECAR (**C**) were measured and quantitated data were showed in (**B**) and (**D**). For OCR (**A**, **B**),  $n = 6$ ; \*  $p < 0.05$ . For ECAR (**C**, **D**),  $n = 3$ . Data are mean  $\pm$  SEM.

**Supplemental Table 2. List of primer sequences for RT-PCR**

| Gene     | Forward (5' – 3')        | Reverse (5' – 3')        |
|----------|--------------------------|--------------------------|
| Pkm1     | GCTGTTTGAAGAGCTTGTGC     | TTATAAGAGGCCTCCACGCT     |
| Pkm2     | TGTCTGGAGAAACAGCCAAG     | TCCTCGAATAGCTGCAAGTG     |
| Nphs1    | ACCTGTATGACGAGGTGGAGAG   | ACCTGTATGACGAGGTGGAGAG   |
| Nphs2    | GTCTCGCCTCCCTGATCTT      | GTCTCGCCTCCCTGATCTT      |
| Fn1      | CGAGGTGACAGAGACCACAA     | CTGGAGTCAAGCCAGACACA     |
| Tgfb1    | CCTGAGTGGCTGTCTTTTGA     | CGTGGAGTTTGTATCTTTGCTG   |
| Col4a    | GACAGCCAGTTTTGACAGGT     | GGCAGCTCTCTCCTTTCTGA     |
| Ctgf     | GTCTTCACACTGGTGCAGCC     | ACTGGAAGACACATTTGGCC     |
| p47phox  | TCCCAACTACGAGGTGAAC      | CCTGGGTTATCTCCTCCCA      |
| Nox2     | CCTGGGTTATCTCCTCCCA      | AGATGTGCAATTGTGTGGATGGCG |
| Nox4     | TGTTGGGCCTAGGATTGTGTT    | AAAAGGATGAGGCTGCAGTTG    |
| Hif1a    | GGATGAGTTCTGAACGTCGAAA   | ACATTGTGGGGAAGTGCCAA     |
| Vegf     | CTCGCAGTCCGAGCCGAGA      | GGTGCAGCCTGGGACCACTTG    |
| Nos3     | GAAGGCTTTTGATCCCCGGTCTG  | CAGTTCCTCCAGCCGTGTGCCAC  |
| Angpt1   | AAATTATACTCAGTGGCTGGAA   | TTCTAGGATTTTATGCTCTAATAA |
| Angpt2   | AGAGTATTGGCTGGGCAACGAGTT | TCCTTTGTGCTAAAATCACTTCCT |
| Ppargc1a | GTCAACAGCAAAAGCCACAA     | TCTGGGGTCAGAGGAAGAGA     |
| Opa1     | GTGTGCTGAAATGATTGCTC     | TGGTGAGATCAAATCCCGAG     |
| mt-Cytb  | TATCGCGGTCTAGCAATCG      | ATGGGGTCGGGTGTTTAGTG     |
| Ndufa9   | CCACCTCGAGTCATGGTGTA     | TTCAAACCGGGCTCTCATCA     |
| Ccl2     | GTCCCTGTCATGCTTCTGG      | GCTCTCCAGCCTACTCATTG     |
| Tnfa     | GCCACCACGCTCTTCTGTCT     | GTCTGGGCCATAGAAGTAT      |
| Il1b     | TCCCGTGGACCTTCCAGGATGAG  | TCGGAGCCTGTAGTGCAGTTGTC  |
| Adgre1   | ACCACAATACCTACATGCACC    | AAGCAGGCGAGGAAAAGATAG    |
| Itgam    | ATGGACGCTGATGGCAATACC    | TCCCATTACGTCTCCCA        |
| 36b4     | GCTCCAAGCAGATGCAGCA      | CCGGATGTGAGGCAGCAG       |



**Supplemental Table 3. List of antibodies**

| Antibodies      | Catalogue number | Source                    | Concentration      |
|-----------------|------------------|---------------------------|--------------------|
| PKM1            | 7067S            | Cell Signaling Technology | 1:1000 dilution    |
| PKM2            | 4053S            | Cell Signaling Technology | 1:1000 dilution    |
| Nephrin         | ab183099         | Abcam                     | 1:1000 dilution    |
| Podocin         | sc-21009         | Santa Cruz Biotechnology  | 1:1000 dilution    |
| AQP1            | sc-25287         | Santa Cruz Biotechnology  | 1:1000 dilution    |
| Actin           | sc-47778 HRP     | Santa Cruz Biotechnology  | 1:100,000 dilution |
| p-eNOS(Ser1177) | BDB612392        | BD Biosciences            | 1:1000 dilution    |
| eNOS            | BDB610297        | BD Biosciences            | 1:1000 dilution    |
| Anti-mouse IgG  | sc-516102        | Santa Cruz Biotechnology  | 1:5000 dilution    |
| Anti-rabbit IgG | sc-2357          | Santa Cruz Biotechnology  | 1:5000 dilution    |
